# Supplementary material
Source: publisher figshare collection journal article supplement (https://gsajournals.figshare.com/ndownloader/files/14023607)
Supplement: Supplementary file 1 [file 14023607]

## Sheet: TableS1
Species	Common Name	NCBI Genome Assembly	RefSeq Gene ID	NCBI Genome Accession Number
Acinonyx jubatus	Cheetah	aciJub1	106988330	NW_015130691.1
Ailuropoda melanoleuca	Giant Panda	AilMel_1.0	100476638	NW_003217580.1
Bos taurus	Cattle	ARS-UCD1.2	540561	NC_037329.1
Castor canadensis	American Beaver	C.can genome v1.0	109695426	NW_017871653.1
Ceratotherium simum	Southern White Rhinoceros	CerSimSim1.0	101407599	NW_004454175.1
Condylura cristata	Star-Nosed Mosed	ConCri1.0	101634827	NW_004567103.1
Dasypus novemcinctus	Nine-Banded Armadillo	Dasnov3.0	101422279	NW_004491115.1
Eptesicus fuscus	Big Brown Bat	EptFus1.0	103283475	NW_007370658.1
Equus caballus	Horse	EqCab3.0	100053844	NC_009161.3
Erinaceus europaeus	Western European Hedgehog	EriEur2.0	103123564	NW_006804632.1
Felis Catus	Domestic Cat	Felis_catus_9.0	101080315	NC_018730.3
Galeopterus variegatus	Sunda Flying Lemur	G_variegatus-3.0.2	103585939	NW_007726398.1
Hipposideros armiger	Great Roundleaf Bat	ASM189008v1	109388924	NW_017731562.1
Homo sapiens	Human	GRCh38.p7	7273	NC_000002.12
Ictidomys tridecemlineatus	Thirteen-Lined Ground Squirrel	SpeTri2.0	101970920	NW_004936509.1
Leptonychotes weddellii	Weddell seal	LepWed1.0	102734247	NW_006387562.1
Loxodonta africana	African Savanna Elephant	Loxafr3.0	104845494	NW_003573423.1
Manis javanica	Malayan Pangolin	ManJav1.0	108397950	NW_016533805.1
Mus musculus	House Mouse	GRCm38.p4	22138	NC_000068.7
Mus pahari	Shrew Mouse	PAHARI_EIJ_v1.1	110317826	NC_034592.1
Myotis brandtii	Brandt's Bat	ASM41265v1	102252525	NW_005353838.1
Myotis davidii	David's Bat	ASM32734v1	102766243	NW_006288615.1
Myotis lucifugus	Little Brown Bat	Myoluc2.0	102440553	NW_005871053.1
Neomonachus schauinslandi	Hawaiian Monk Seal	ASM220157v1	110592043	NW_018734396.1
Ochotona princeps	American Pika	OchPri3.0	101518430	NW_004535436.1
Odobenus rosmarus	Pacific Walrus	Oros_1.0	101365205	NW_004450459.1
Orcinus orca	Killer Whale	Oorc_1.1	101287117	NW_004438435.1
Ornithorhynchus anatinus	Platypus	Ornithorhynchus_anatinus-5.0.1	103171044	NW_001794453.1
Oryctolagus cuniculus	Rabbit	OryCun2.0	100008570	NC_013675.1
Pan troglodytes	Chimpanzee	Clint_PTRv2	459784	NC_036881.1
Phascolarctos cinereus	Koala	phaCin_unsw_v4.1	110211623	NW_018343992.1
Ponga abelii	Sumatran Orangutan	Susie_PABv2	100435464	NC_036905.1
Pteropus vampyrus	Flying Fox	Pvam_2.0	105291923	NW_011888783.1
Rattus norvegicus	Norway Rat	Rnor_6.0	84015	NC_005102.4
Rhinolophus sinicus	Chinese Rufous Horseshoe Bat	ASM188883v1	109451227	NW_017739068.1
Sarcophilus harisii	Tasmanian devil	Devil_ref v7.0	100923152	NW_003831646.1
Sorex araneus	Common shrew	SorAra2.0	101548803	NW_004545858.1
Sus scrofa	Pig	Sscrofa11.1	100519519	NC_010457.5
Trichechus manatus	Florida Manatee	TriManLat1.0	101353907	NW_004443973.1
Tupaia chinensis	Chinese Tree Shrew	TupChi_1.0	102500174	NW_006159816.1
Tursiops truncatus	Bottlenose Dolphin	NIST Tur_tru v1	101325690	NW_017842948.1
Ursus maritimus	Polar Bear	UrsMar_1.0	103659915	NW_007907079.1
Vicugna pacos	Alpaca	Vicugna_pacos-2.0.1	102543991	NW_005882810.1

## Sheet: Table S2
Chr. 2 Start	Chr. 2 Stop	LRG_391 2013 Exon (LOVD)	CCDS 59435.1 Exon*	Genomic Sequence	*NCBI CCDS database: https://www.ncbi.nlm.nih.gov/CCDS/CcdsBrowse.cgi?REQUEST=CCDS&GO=MainBrowse&DATA=CCDS59435.1
178694829	178694906	113	112	TTACCAAAAAGGCTGTGAAGAAAGATGCCAAAAAAGTTGTTGCAAAGCCCAAAGAGATGACACCACGTGAAG
178695348	178695410	114	113	AGATTGTCAAGAAGCCTCCACCTCCTACTACCTTAATTCCAGCAAAAG
178695865	178696269	115	114	CTCCTGAAATCATTGATGTATCCTCTAAAGCTGAAGAAGTAAAAATAATGACTATAACCAGAAAGAAAGAGGTTCAGAAAGAAAAAGAAGCTGTGTATGAGAAAAAGCAAGCAGTCCACAAGGAGAAGAGAGTCTTCATTGAATCTTTCGAAGAACCTTATGACGAACTGGAGGTAGAACCATACACAGAGCCATTTGAACAACCTTATTATGAAGAACCAGATGAAGACTATGAAGAGATTAAGGTAGAAGCTAAAAAAGAAGTTCACGAGGAATGGGAAGAAGATTTTGAAGAAGGGCAAGAATACTATGAAAGGGAGAAGGCTATGACGAAGGGGAGGAAGAGTGGGAAGAGGCTTACCAAGAAAGGGAAGTAATTCAAGTTCAAAAGGAGGTCTA…
178695348	178695410	116	115	AATCACATGAGAGAAAAGTTCCAGCCAAAGTACCTGAAAAGAAAGCACCACCACCTCCTAAAG
178694829	178694906	117	116	TTATAAAGAAGCCAGTAATTGAAAAAATTGAAAAGACTTCTCGAAGAATGGAGGAAGAAAAAGTTCAAGTCACCAAAG
178694599	178694676	118	117	TACCTGAAGTTTCAAAGAAGATTGTTCCACAAAAACCTTCCCGGACTCCAGTACAGGAAGAAGTTATTGAAGTGAAAG
178693922	178694008	119	118	TACCAGCTGTGCATACAAAGAAGATGGTTATTTCAGAAGAAAAGATGTTCTTTGCTTCTCACACAGAGGAGGAGGTGTCAGTCACAG
178693609	178693689	120	119	TCCCCGAGGTACAAAAGGAAATTGTTACTGAAGAGAAAATTCACGTTGCCATTTCCAAAAGGGTTGAACCACCACCTAAAG
178692497	178692580	121	120	TCCCTGAGCTACCTGAGAAACCAGCTCCAGAAGAAGTGGCCCCTGTTCCTATCCCTAAAAAAGTGGAGCCCCCAGCACCAAAAG
178692016	178692099	122	121	TTCCTGAGGTTCCCAAGAAACCCGTGCCAGAGGAGAAAAAGCCAGTTCCTGTGCCTAAGAAGGAACCTGCTGCTCCCCCAAAAG
178689813	178689896	123	122	TCCCAGAGGTGCCAAAGAAACCTGTCCCTGAAGAAAAGATTCCCGTTCCTGTTGCAAAGAAAAAGGAAGCTCCCCCAGCTAAAG
178689515	178689595	124	123	TTCCTGAAGTACAGAAGGGAGTTGTGACAGAAGAAAAAATAACCATTGTAACTCAAAGAGAGGAATCTCCACCACCAGCAG
178689290	178689373	125	124	TGCCAGAAATACCAAAGAAGAAAGTTCCTGAAGAAAGGAAACCTGTTCCTCGGAAGGAGGAAGAAGTTCCACCACCACCAAAAG
178689053	178689136	126	125	TGCCAGCTCTGCCTAAGAAACCCGTCCCAGAGGAGAAAGTTGCAGTGCCAGTTCCTGTCGCTAAGAAAGCTCCTCCTCCCCGAG
178688677	178688778	127	126	CTGAAGTCTCTAAGAAAACTGTTGTAGAAGAAAAGAGATTTGTTGCTGAAGAAAAACTATCCTTCGCAGTTCCTCAAAGAGTGGAAGTCACGCGGCACGAAG
178688111	178688224	128	127	TATCTGCAGAGGAGGAATGGAGTTACTCAGAAGAGGAGGAAGGTGTGTCCATTTCAGTTTATAGAGAAGAAGAAAGAGAGGAGGAGGAAGAAGCAGAGGTTACAGAATATGAAG
178685518	178685598	129	128	TGATGGAAGAGCCTGAGGAATATGTTGTGGAAGAAAAGCTGCACATTATTTCTAAGAGAGTGGAAGCTGAGCCAGCTGAAG
178685253	178685330	130	129	TGACAGAGAGGCAGGAGAAGAAAATTGTACTGAAACCAAAAATTCCTGCTAAAATAGAGGAGCCTCCACCGGCTAAAG
178684906	178684989	131	130	TTCCTGAAGCACCTAAGAAAATTGTGCCAGAAAAGAAAGTTCCTGCTCCAGTTCCTAAAAAGGAAAAGGTGCCCCCACCTAAAG
178684666	178684749	132	131	TGCCAGAAGAGCCAAAGAAACCAGTTCCAGAAAAAAAGGTTCCTCCAAAAGTCATTAAGATGGAAGAACCTCTCCCAGCCAAAG
178684330	178684413	133	132	TGACTGAGAGGCACATGCAAATTACCCAGGAAGAAAAAGTTCTTGTTGCTGTAACTAAAAAAGAGGCGCCTCCAAAAGCAAGAG
178683999	178684082	134	133	TGCCAGAGGAACCGAAGAGAGCTGTCCCAGAAGAAAAAGTTCTGAAACTCAAACCTAAAAGAGAGGAGGAACCACCAGCTAAAG
178683211	178683291	135	134	TGACTGAATTCAGAAAAAGAGTGGTTAAAGAAGAAAAAGTATCAATTGAAGCTCCAAAAAGAGAACCTCAACCCATCAAAG
178682697	178682903	136	135	AAGTAACTATAATGGAAGAGAAAGAAAGGGCTTATACCCTAGAAGAAGAAGCTGTTTCAGTACAACGGGAAGAAGAATATGAGGAATATGAAGAATATGATTATAAAGAATTTGAGGAGTATGAACCAACAGAAGAATATGACCAATATGAAGAATACGAGGAGCGGGAGTATGAACGATATGAAGAGCATGAAGAATACATCACAG
178681661	178681738	137	136	AACCAGAGAAGCCTATCCCTGTAAAGCCTGTCCCAGAAGAACCAGTTCCCACAAAACCAAAGGCCCCACCGGCTAAAG
178681376	178681450	138	137	TGCTGAAGAAAGCTGTCCCTGAAGAAAAAGTACCAGTGCCCATTCCTAAGAAACTCAAACCTCCACCACCCAAAG
178681079	178681171	139	138	TGCCTGAAGAACCAAAGAAAGTTTTTGAGGAAAAAATACGTATTTCAATTACCAAACGTGAAAAAGAGCAGGTGACTGAACCCGCTGCTAAAG
178680254	178680331	140	139	TGCCCATGAAGCCCAAGAGGGTTGTCGCAGAAGAAAAAGTACCTGTCCCTAGAAAAGAAGTAGCACCACCTGTTAGAG
178679894	178680055	141	140	TGCCAGAAGTGCCTAAAGAACTTGAACCAGAAGAGGTTGCCTTTGAAGAGGAAGTTGTAACCCATGTAGAAGAATATCTTGTAGAAGAAGAAGAAGAGTACATTCATGAAGAAGAGGAGTTCATAACTGAGGAAGAAGTGGTGCCAGTGATACCAGTCAAAG
178679599	178679682	142	141	TGCCTGAGGTACCCAGGAAACCTGTTCCAGAAGAGAAGAAACCTGTTCCTGTTCCCAAGAAGAAGGAAGCTCCACCGGCAAAAG
178679339	178679416	143	142	TGCCTGAGGTTCCTAAGAAGCCAGAGGAGAAAGTTCCTGTGCTTATTCCTAAAAAGGAGAAGCCTCCGCCAGCAAAAG
178678747	178678830	144	143	TTCCTGAAGTGCCCAAGAAACCTGTGCCAGAGGAGAAAGTACCAGTACCAGTTCCTAAAAAGGTGGAAGCTCCACCTGCCAAAG
178678414	178678497	145	144	TGCCAGAGGTACCCAAGAAGCCTGTGCCTGAGAAGAAGGTGCCAGTTCCTGCTCCTAAGAAAGTGGAGGCTCCACCTGCAAAAG
178678125	178678208	146	145	TGCCAGAGGTGCCCAAGAAGCTCATCCCAGAAGAAAAGAAACCAACACCTGTTCCGAAAAAAGTGGAAGCACCACCACCCAAAG
178677621	178677917	147	146	TGCCAAAGAAACGTGAACCAGTTCCAGTTCCTGTAGCTCTACCTCAGGAAGAGGAAGTTCTATTTGAAGAAGAAATTGTTCCTGAAGAGGAAGTTCTACCTGAGGAAGAGGAAGTTCTACCTGAGGAAGAGGAAGTTCTACCTGAAGAAGAGGAAGTTCTACCTGAAGAAGAGGAAATTCCACCTGAGGAAGAGGAAGTTCCTCCCGAAGAAGAATATGTACCTGAGGAAGAAGAATTTGTACCTGAAGAAGAAGTCCTTCCAGAAGTTAAACCTAAGGTGCCAGTACCTGCACCAG
178677201	178677287	148	147	TGCCTGAAGTGCCAAAGAAACCTGTACCAGAGAAGAAAGTCCCTGTTCCCGCCCCTAAAAAAGTGGAACCTCCACCACCACCCAAAG
178675921	178675995	149	148	TGCCTGAAATTAAGAAGAAAGTGACAGAGAAGAAAGTGGTCATTCCCAAGAAAGAGGAGGCTCCCCCTGCCAAAG
178675671	178675754	150	149	TGTCTGTGGTACCTAAGAAACCTGAGCCAGAAAAGAAGGTCCCTCCTCCTGGTCTTAAGAAAGCAGTGGCCCCTCCTGCCAAAG
178675039	178675113	151	150	TTCCTGAGGTGCCTAAGAAGGTGGAAGAAAAACGAATCATTCTCCCTAAAGAAGAGGAAGTTCTACCAGTTGAAG
178674314	178674409	152	151	TGACTGAGGAGCCTGAAGAAGAGCCTATTTCAGAAGAAGAAATCCCAGAAGAACCACCTAGCATAGAGGAAGTTGAAGAGGTGGCACCACCTAGAG
178673633	178673710	153	152	TGCCTGAAGTGATTAAGAAAGCAGTACCTGAAGCACCTACTCCTGTTCCTAAAAAAGTGGAGGCACCACCAGCTAAAG
178672635	178672703	154	153	TGTCAAAGAAAATTCCTGAGGAAAAAGTACCTGTTCCTGTTCAGAAAAAAGAGGCACCCCCAGCCAAAG
178672407	178672481	155	154	TGCCTGAAGTACCAAAGAAAGTCCCAGAAAAGAAAGTCCTTGTGCCTAAAAAGGAAGCTGTTCCCCCAGCTAAAG
178671971	178672267	156	155	GGAGAACTGTCCTTGAAGAAAAAGTATCAGTTGCCTTCCGCCAAGAAGTAGTAGTAAAAGAAAGACTAGAATTAGAAGTAGTAGAAGCAGAAGTGGAAGAAATTCCGGAAGAAGAAGAGTTCCATGAAGTTGAAGAATATTTTGAAGAAGGCGAGTTTCATGAAGTAGAAGAATTCATCAAATTAGAACAACATAGAGTTGAAGAAGAACACAGAGTTGAAAAAGTTCATAGGGTAATAGAAGTTTTTGAGGCTGAAGAAGTGGAAGTATTTGAAAAACCAAAAGCTCCACCTAAAG
178671090	178671170	157	156	GGCCTGAGATATCTGAGAAAATCATCCCTCCAAAAAAACCGCCCACTAAAGTTGTTCCTCGAAAAGAGCCACCAGCTAAAG
178670218	178670295	158	157	TACCGGAGGTGCCTAAGAAAATTGTGGTAGAAGAAAAAGTACGTGTTCCTGAAGAGCCCAGAGTTCCACCAACTAAAG
178669592	178669675	159	158	CACCCGAAGTACCCAAGAAAATTGTCCCAGAAGAAAAAGTTCGTGAAGCTGTTCTGAAAAAGCCTGAAGTTCCACCAGCTAAAG
178669373	178669447	160	159	TTCCTGGGATGCCTAAGAAAAGTGTTCAAGAAGAAAAATCACCTATTGTTATTTCTGAAGACACAGAGATGTACA
178667638	178667721	161	160	TTTATGAAGCATCTGAAGAAGCAGTCCTAGAAGAAAAAGTACTTGTGACTCAACCTCAAAAGACAAAACCCAAACTAGCAAAAG
178667442	178667525	162	161	TGCCTGAGCCACCCAAGAAAGTTGTTCCAGAAGACAAAATATATGTGACTATTCCTAAAAAGAGAGAAACACCAGCAACTAAAG
178667236	178667319	163	162	AACCTGATACAACCAGAGGCATTTTTCCAGAGGTGGAGCCACCTGAGGCTATTCCTGAAATTCCAGAACATCCTCCAACTGAAG
178666824	178666901	164	163	AGTTTGAAGTCTTCAAGGAAGTCATTCCAGAGGGAGAAACTCCTATTGTTAAAAGAAGAAAAACACCATCACCAACAG
178665708	178665791	165	164	TGCCTGAATCACCTCGAGAAATTGTCCCTGTAAAGGAAACACCCATGGCTGCTCCCCTTGAAATTGAAATACCTCCCACTAAAG
178665377	178665460	166	165	CACCAGAAGCTATGAAAGAAGTTGTCCCTGAAATGAAAATATTTGAGGATGTACCTGAAGAGCCAGAAACTCCACGTATGAAAA
178664852	178664926	167	166	CGCCCGAAGCTCCTCAAGAAATTATTCCTGCCAAGACAGTTCCTTCCAAAAAAAGAGAACCCCCATCAGTTAAAG
178664654	178664737	168	167	TGCCTGAAGCTCTCCAAGAAATTGTCCCTGAAAAGAAAACGCTTGTGGTTCCTCTCAGAAAGCCTGAAGTCCTTCCTGATGAAG
178664460	178664537	169	168	TGCCGGAGGCTCTCAGAGAAGTTGTCCCGGAAAAGAAAGTGCATCCTCCCCAAAGGGCTGAAGTTGTACCTGTCAAAG
178664015	178664098	170	169	TGCACGAAGCTCCCAAAGAGATTATCCCTGAAAAGAAAGTGTCGGTGGTGCCTCCTAAAAAGCCTGAAGTCCCACCTGTTAAAG
178663819	178663902	171	170	TGCCAGAAGCTTCCAAAGAGGTTATCCGCGAAGAGAAAGTGCCCTTGGCTCCTCCTAAAGAGCCTGAAGTCCCACCTGTTAAAG
178663627	178663710	172	171	TACCAGAGCCTCCCAAAGAAGTAGTTCCTGAAAAGAAAGCGCCAGTGGCTCCTCCTAAAGAGCCTGAAGTCCCACCTGTTAAAG
178663433	178663516	173	172	TGCCTGAGGCTCCCAAAGAAGTTGTTCCTGAAAAGAAAGTGCCAGTGCCTCCTCCTAAAAAGCCTGAAGTGCCACCCACAAAAG
178663266	178663349	174	173	TCCCAGAGGTGCCAAAGGCAGCTGTCCCAGAAAAGAAGTTGCCTGAAGCTATTCCTCCCAAACCGGAAAGTCCTCCCCCTGAAG
178662966	178663055	175	174	TGCCTGAAGTGCTGCCACCGAAGGAAGTGGTCCCAGAAAAGAAAGTACCGGTGCCTCCTGCCAAAAAGCCAGAAGCTCCACCTCCTAAAG
178662729	178662812	176	175	TTCCTGAAGCTCCTAAAGAAGTTGTACTTGAAAAGAAAGCATCTGTGGCTGTGCCCAAAAAACCGGAAGCCCCACGTGCAAAAG
178662533	178662616	177	176	TGCCTGAAGCTGCTCAAGAAGTTGTCCCAGAAAAGAAAATTCCCAAGGCACCAATCAAAAAACCAGAAGCCCCCGCAGTTACAG
178662338	178662418	178	177	TGCCAGAAGTTCCTCAAGAAGCCACAGAAAAAGAAATTCCCGTGGCTCCACCCAAAAAACCAGAAGCTCCAATTGTCCCAG
178662142	178662222	179	178	TGCCTGAAGCTCAAGAAGTTGTCCCAGAAAAGAAAGTTCCTAAGGCTCCTCCCACAAAACCAGAAGCCCCACCTGCCACAG
178661948	178662028	180	179	TGCCTGAAGTCCCACAAGAAATTGTGCCAGAAAAGAAAACACTGGTGCTTCCTAAAAAGCCAGAAGTTCCACCTGTTACAG
178661759	178661842	181	180	TGCCAGAGGCTCCCAAAGAAGTTGTCCTTGAAAAGAAAGTGCCCTCGGCTCCTCCTAAAAAGCCTGAAGTCCCACCTGTTAAAG
178659172	178659255	182	181	TGCCTGAGGCTCCCAAAGAAGTTGTTCCTGAAAAGAAAGTGCCAGTGCCTCCTCCTAAAAAGCCTGAAGTGCCACCCACAAAAG
178659005	178659088	183	182	TCCCAGAGGTGCCAAAGGCAGCTGTCCCAGAAAAGAAGGTGCCTGAAGCTATTCCTCCCAAACCGGAAAGTCCTCCCCCTGAAG
178658705	178658794	184	183	TGCCTGAAGTGCTGCCACCGAAGGAAGTGGTCCCAGAAAAGAAAGTACCGGTGCCTCCTGCCAAAAAGCCAGAAGCTCCACCTCCTAAAG
178658468	178658551	185	184	TTCCTGAAGCTCCTAAAGAAGTTGTACTTGAAAAGAAAGCATCTGTGGCTGTGCCCAAAAAACCGGAAGCCCCACGTGCAAAAG
178658272	178658355	186	185	TGCCTGAAGCTGCTCAAGAAGTTGTCCCAGAAAAGAAAATTCCCAAGGCACCAATCAAAAAACCAGAAGCCCCCGCAGTTACAG
178658077	178658157	187	186	TGCCAGAAGTTCCTCAAGAAGCCGCAGAAAAAGAAATTCCCGTGGCTCCACCCAAAAAACCAGAAGCTCCGATTGTCCCAG
178657881	178657961	188	187	TGCCTGAAGCTCAAGAAGTTGTCCCAGAAAAGAAAGTTCCTAAGGCTCCTCCCACAAAACCAGAAGCCCCACCTGCCACAG
178657687	178657767	189	188	TGCCTGAAGTCCCACAAGAAATTGTGCCAGAAAAGAAAACACTGGTGCTTCCTAAAAAGCCAGAAGTTCCACCTGTTACAG
178657498	178657581	190	189	TGCCAGAGGCTCCCAAAGAAGTTGTCCTTGAAAAGAAAGTGCCCTCGACTCCTCCTAAAAAGCCTGAAGTCCCACCTGTTAAAG
178654912	178654995	191	190	TGCCTGAGGCTCCCAAAGAAGTTGTTCCTGAAAAGAAAGTGCCAGTGCCTCCTCCTAAAAAGCCTGAAGTGCCACCCACAAAAG
178654745	178654828	192	191	TCCCAGAGGTGCCAAAGGCAGCTGTCCCAGAAAAGAAGGTGCCTGAAGCTATTCCTCCCAAACCGGAAAGTCCTCCCCCTGAAG
178654445	178654534	193	192	TGCCTGAAGTGCTGCCACCGAAGGAAGTGGTCCCAGAAAAGAAAGTACCGGTGCCTCCTGCCAAAAAGCCAGAAGCTCCACCTCCTAAAG
178654208	178654291	194	193	TTCCTGAAGCTCCTAAAGAAGTTGTACTTGAAAAGAAAGTATCTGTGGCTGTGCCCAAAAAACCGGAAGCCCCACGTGCAAAAG
178654012	178654095	195	194	TGCCTGAAGCTGCTCAAGAAGTTGTCCCAGAAAAGAAAATTCCCAAGGCACCAATCAAAAAACCAGAAGCCCCCGCAGTTACAG
178653817	178653897	196	195	TGCCAGAAGTTCCTCAAGAAGCCGCAGAAAAAGAAATTCCCGTGGCTCCACCCAAAAAACCAGAAGCTCCAATTGTCCCAG
178653621	178653701	197	196	TGCCTGAAGCTCAAGAAGTTGTCCCAGAAAAGAAAGTTCCTAAGGCTCCTCCCACAAAACCAGAAGCCCCACCTGCCACAG
178653427	178653507	198	197	TGCCTGAAGTCCCACAAGAAATTGTGCCAGAAAAGAAAACACTGGTGCTTCCTAAAAAGCCAGAAGTTCCACCTGTTACAG
178653238	178653321	199	198	TGCCAGAGGCTCCCAAAGAAGTTGTCCTTGAAAAGAAAGTGCCCTTGGCTCCTCCTAAAAAGCCTGAAGTCCCACCTGTTAAAG
178653041	178653124	200	199	TGCCAGAGGCTCCCAAAGAAGTTGTTCCTGAAAAGAAAGTGCCAGTGACTCCTCCTAAAAAACCTGAAGTCCCACCTGTTAAAG
178652848	178652931	201	200	TGCCAGAGGCTCCCATAGAGGTTGTTCCTGAAAAGAAAATGCCCTTGGCTCCTCCTAAAAAGCCTGAAGTCCCTCCTGTTAAAG
178652653	178652736	202	201	TACCAGAGGCTCCCAAAGAGGTTGTTCCTGAAAAGAAAGTGCCCTCGGCTCCTCCTAAAAAGCCTGAAGTCCCACCTGTTAAAG
178652458	178652541	203	202	TGCCAGAGGCTCCGAAAGAAGTTGTTCCTGAAAAGAAAGTGCCAGCGGCTCCTCCTAAAAAGCCTGAAGTCACACCTGTTAAAG
178652264	178652347	204	203	TGCCTGAGGCTCCCAAAGAAGTTGTTCCTGAAAAGAAAGTGCCAGTGCCTCCTCCTAAAAAGCCTGAAGTGCCACCCACAAAAG
178652096	178652179	205	204	TCCCAGAGGTGCCAAAGGTAGCTGTCCCAGAAAAGAAGGTGCCTGAAGCTATTCCTCCCAAACCGGAAAGTCCTCCCCCTGAAG
178651884	178651967	206	205	TGTTCGAGGAGCCTGAGGAAGTTGCCCTAGAAGAGCCTCCTGCTGAAGTTGTGGAAGAGCCAGAGCCAGCGGCGCCTCCACAAG
178651666	178651749	207	206	TGACCGTACCACCTAAGAAACCTGTCCCAGAAAAGAAAGCACCTGCTGTCGTTGCCAAAAAACCTGAACTACCACCAGTGAAAG
178651453	178651536	208	207	TGCCCGAGGTGCCCAAGGAGGTTGTTCCTGAAAAGAAGGTGCCTCTGGTGGTTCCCAAAAAGCCAGAAGCCCCACCTGCTAAAG
178651243	178651320	209	208	TGCCTGAAGTTCCAAAAGAAGTTGTTCCAGAAAAGAAAGTAGCTGTTCCCAAAAAGCCAGAAGTCCCACCAGCAAAAG
178650751	178650834	210	209	TGCCAGAAGTGCCAAAGAAACCTGTCTTGGAAGAGAAACCAGCTGTTCCTGTTCCAGAAAGAGCGGAGTCTCCTCCCCCAGAAG
178650164	178650271	211	210	TATATGAAGAACCTGAGGAAATTGCTCCTGAAGAGGAAATTGCTCCTGAAGAGGAAAAGCCAGTTCCTGTTGCAGAAGAGGAGGAACCAGAGGTTCCACCTCCAGCAG
178649817	178649894	212	211	TGCCTGAAGAGCCCAAGAAGATCATCCCAGAGAAGAAAGTTCCTGTCATCAAAAAACCAGAAGCACCGCCTCCTAAAG
178649554	178649631	213	212	AACCTGAGATGCCAAAGAAAGTTGTTCCAGTGAAGAAGGTCCCAACTGTTAAGAAGCCAGAAACACCAGCAGCTAAAG
178649248	178649331	214	213	TGCCTGAGGTGCCCAAGAAACTTGTTCCAGTAAAGAAAGAACCTGTGCCTGTTACCAAAAAACCAGAAGTTCTTCCAGAAAAAG
178647381	178647464	215	214	TGCCCAAAGTGCCTGAGAAAATCATCCCAGAAAAGGAAGTGTCTGTGCCTATCCCTGCAGAGCCAGAAGTTCCACCTGCTGAAG
178647064	178647144	216	215	TTGAAGAGACTCCTGAGGAAATAATATATGAAGAAAAAGCATCTATAACCATTGGTAGAAAAGAGACTCCCCCTGTTGAAG
178646485	178646559	217	216	AACGTGAAATTGAAAAGTATATTAAACCTGAAGAGCCCGAACCTGAACCACAGCCTGAAGAAATACCAGTAAAAG
178645920	178646030	218	217	AACCTGAACCTGAAAAGGTTATTGAGAAGCCAAAACTCAAACCAAGACCCCCACCTCCTCCACCTGCTCCACCTAAGGAAGATGTGAAGGAGAAAATATTCCAACTTAAAG
178644548	178644616	219	218	CTATTCCAAAGAAGAAAGTTCCTGAAAAACCTCAGGTTCCAGAAAAAGTGGAGCTTACACCTCTGAAAG
178642237	178642317	220	219	TGCCTGGAGGTGAAAAGAAAGTTCGCAAATTACTTCCGGAACGTAAACCTGAACCAAAGGAAGAAGTTGTTCTGAAAAGCG
178641241	178641315	221	220	TTCTAAGAAAAAGACCTGAAGAAGAAGAACCTAAAGTAGAACCTAAAAAACTAGAAAAAGTTAAAAAACCTGCAG
178640541	178640630	222	221	TACCAGAACCACCACCTCCAAAACCTGTTGAAGAGGTTGAAGTACCTACTGTTACAAAAAGGGAAAGGAAGATTCCTGAACCAACAAAAG
178640048	178640110	223	222	TGCCTGAAATCAAGCCAGCAATACCTCTCCCTGCACCTGAACCGAAACCAAAGCCCGAAGCAG
178639699	178639788	224	223	AAGTGAAAACAATCAAACCACCTCCTGTGGAACCTGAACCAACCCCCATCGCTGCCCCAGTAACAGTGCCAGTGGTTGGAAAGAAAGCAG
178637369	178637419	225	224	AAGCCAAAGCACCTAAGGAAGAGGCTGCCAAGCCAAAAGGTCCTATCAAAG

## Sheet: Table S3
Species	PEVK Finder Exons	PEVK-N Exons	PEVK-C Exons	Gnomon Exons	Consensus Exons	Total Exons	% PEVK_Finder Exons of Total	% Gnomon Exons of Union	cDNA?	NCBI for cDNA
Acinonyx jubatus	87	50	37	79	72	94	0.925532	0.840426	N	-
Ailuropoda melanoleuca	96	50	46	85	77	104	0.923077	0.817308	N	-
Bos taurus	95	53	42	94	88	101	0.940594	0.930693	N	-
Castor canadensis	90	48	42	86	82	94	0.957447	0.914894	N	-
Ceratotherium simum	95	53	42	74	69	100	0.95	0.74	N	-
Condylura cristata	74	46	28	66	58	82	0.902439	0.804878	N	-
Dasypus novemcinctus	97	48	49	77	70	104	0.932692	0.740385	N	-
Eptesicus fuscus	82	51	31	89	82	89	0.921348	1	N	-
Equus caballus	100	53	47	69	65	104	0.961538	0.663462	N	-
Erinaceus europaeus	103	48	55	66	61	108	0.953704	0.611111	N	-
Felis Catus	88	49	39	78	69	97	0.907216	0.804124	N	-
Galeopterus variegatus	104	52	53	76	63	117	0.888889	0.649573	N	-
Hipposideros armiger	86	50	36	67	62	91	0.945055	0.736264	N	-
Homo sapiens	109	51	58	113	108	114	0.9561	0.933884	Y	NM_001267550 (RefSeq)
Ictidomys tridecemlineatus	78	49	29	67	58	87	0.896552	0.770115	N	-
Loxodonta africana	99	53	46	71	61	109	0.908257	0.651376	N	-
Manis javanica	92	55	37	61	55	98	0.938776	0.622449	N	-
Mus musculus	93	50	43	99	88	104	0.8942	0.876106	Y	ENSMUST00000099981.8 (Ensembl)
Mus pahari	75	49	26	70	61	84	0.8929	0.736842	Y	XM_021192635 (RefSeq)
Myotis brandtii	86	50	36	75	71	90	0.955556	0.833333	N	-
Myotis davidii	85	50	35	64	60	89	0.955056	0.719101	N	-
Myotis lucifugus	83	43	40	75	66	92	0.902174	0.815217	N	-
Neomonachus schauinslandi	78	49	29	66	61	83	0.939759	0.795181	N	-
Ochotona princeps	93	52	41	66	62	97	0.9588	0.616822	Y	XM_004577006 (RefSeq)
Odobenus rosmarus	78	51	27	66	63	81	0.962963	0.814815	N	-
Orcinus orca	90	52	38	64	63	91	0.989011	0.703297	N	-
Ornithorhynchus anatinus	91	50	41	84	78	97	0.938144	0.865979	N	-
Oryctolagus cuniculus	93	51	42	78	74	97	0.958763	0.804124	N	-
Pan troglodytes	87	46	41	77	69	95	0.915789	0.810526	N	-
Phascolarctos cinereus	101	49	52	72	66	107	0.943925	0.672897	N	-
Pongo abelii	100	49	51	67	60	107	0.934579	0.626168	N	-
Pteropus vampyrus	83	50	33	66	63	86	0.965116	0.767442	N	-
Rattus norvegicus	89	48	41	72	66	95	0.936842	0.757895	N	-
Rhinolophus sinicus	87	49	38	73	67	93	0.9355	0.73	Y	XM_019739277 (RefSeq)
Sarcophilus harrisii	88	44	44	65	60	93	0.946237	0.698925	N	-
Sus scrofa	90	52	38	69	64	95	0.947368	0.726316	N	-
Trichechus manatus	86	54	32	68	61	93	0.924731	0.731183	N	-
Tupaia chinensis	83	49	34	67	61	89	0.932584	0.752809	N	-
Tursiops truncatus	74	52	22	66	61	79	0.936709	0.835443	N	-
Ursus maritimus	91	49	42	66	61	96	0.947917	0.6875	N	-
Vicugna pacos	88	53	35	76	73	91	0.967033	0.835165	N	-
Mean	89.439	50	39.4634	73.878	67.7805	95.5366	0.936363	0.766927
SD	8.33081	2.50998	8.12434	10.6047	10.2799	8.849	0.0234638	0.0928936
